# Supplementary material for: Structural basis for the specialization of Nur, a nickel-specific Fur homolog, in metal sensing and DNA recognition
Source: PubMed Central journal article supplement — Nucleic Acids Res. 2009 Mar 31;37(10):3442–51. doi: 10.1093/nar/gkp198 (PMC2691836; doi:10.1093/nar/gkp198), 2009-03-31
Supplement: gkp198_2.pdf [file gkp198_2.pdf]

Supplementary Table 1.

Metal Contents of purified Nur proteins<sup>a</sup>.

|             | Number of Ni/ Nur monomer |                 |             | Number Zn/ Nur monomer |                 |             |
|-------------|---------------------------|-----------------|-------------|------------------------|-----------------|-------------|
|             | 1 <sup>st</sup>           | 2 <sup>nd</sup> | Avg         | 1 <sup>st</sup>        | 2 <sup>nd</sup> | Avg         |
| <b>WT</b>   | <b>0.56</b>               | <b>0.48</b>     | <b>0.52</b> | <b>0.55</b>            | <b>0.69</b>     | <b>0.62</b> |
| <b>H72A</b> | <b>0.35</b>               | <b>0.18</b>     | <b>0.27</b> | <b>0.6</b>             | <b>0.58</b>     | <b>0.59</b> |
| <b>H90A</b> | <b>0.49</b>               | <b>0.35</b>     | <b>0.42</b> | <b>0.47</b>            | <b>0.57</b>     | <b>0.52</b> |

<sup>a</sup> Purified Nur proteins were subjected to ICP-AES to estimate metal contents (See Supplementary Methods). Analyzed values obtained from two separate preparations of three Nur proteins (wild type, H72A mutant, and H90A mutant) were presented. Amount of other metals, such as iron, manganese, and copper were under the detection limit (< 0.1 ppm). In the buffer solution, the amount of Ni and Zn were below the detection limit (< 0.1 ppm). The exact amount of detected metals in wild type Nur somewhat varies depending on purification conditions. Therefore, we purified two sets of three Nur proteins concomitantly for metal analysis and present values for each set of three.

Supplementary Table 2. Data collection and Refinement

| Data sets, Space group              | Peak,<br>$P3_1$ | Inflection,<br>$P3_1$ | Remote,<br>$P3_1$ |
|-------------------------------------|-----------------|-----------------------|-------------------|
| Wavelength (Å)                      | 1.4847          | 1.4857                | 1.4510            |
| Resolution (Å)                      | 50-2.4          | 50-2.4                | 50-2.4            |
| Completeness (%) <sup>1</sup>       | 99.8 (99.8)     | 99.8 (98.3)           | 99.8 (98.8)       |
| $R_{\text{sym}}$ (%) <sup>1,2</sup> | 5.5 (54.0)      | 5.6 (58.1)            | 5.4 (57.8)        |
| Number of unique reflections        | 18,205          | 18,186                | 18,240            |
| Average Redundancy                  | 3.7 (3.1)       | 3.7 (3.1)             | 3.7 (3.1)         |
| Mosaicity                           | 0.300           | 0.558                 | 0.566             |
| <b>Refinement statistics</b>        |                 |                       |                   |
| Resolution range (Å)                | 20-2.4          |                       |                   |
| Number of hetero atoms              |                 |                       |                   |
| Water                               | 82              |                       |                   |
| Malonate                            | 3               |                       |                   |
| Chloride                            | 5               |                       |                   |
| Ethylene glycol                     | 4               |                       |                   |
| $R^3$ ( $R_{\text{free}}$ ) (%)     | 22.4(27.0)      |                       |                   |
| R.m.s. deviations <sup>4</sup>      |                 |                       |                   |
| Bonds (Å)                           | 0.007           |                       |                   |
| Angles (°)                          | 1.3             |                       |                   |

<sup>1</sup>The number in parentheses is for the outer shell

<sup>2</sup> $R_{\text{sym}} = \sum_{\Sigma h} \sum_{\Sigma I} |I_{h,i} - I_h| / \sum_{\Sigma h} \sum_{\Sigma I} \sum_{\Sigma I} I_{h,i}$ , where  $I_h$  is the mean intensity of the  $i$  observations of symmetry related reflections of  $h$ .

<sup>3</sup> $R = \Sigma |F_o - F_c| / \Sigma F_o$ , where  $F_o = F_p$ , and  $F_c$  is the calculated protein structure factor from the atomic model.  $R_{\text{free}}$  was calculated with 10 % of the reflections.

<sup>4</sup>R.m.s. deviations in bond length and angles are the deviations from ideal values.
